# Supplementary material for: Regulation of the THRA gene, encoding the thyroid hormone nuclear receptor TRα1, in intestinal lesions
Source: PubMed Central journal article supplement (PMC9718118; doi:10.1002/1878-0261.13298), 2022-10-10
Supplement: MOL2-16-3975-s003.pdf [file MOL2-16-3975-s003.pdf]

**Table S3. TMA analysis**

| TMA Map Location                      | Tissue of (Origin/Finding)                      | Appearance | Sample Pathology from Cytomorphology Pathology Verification | Case Diagnosis from Donor Institution Pathology Report | Tumor Grade                        | TNM       | Stage Grouping | TRa1 IHC            |        |        |        |
|---------------------------------------|-------------------------------------------------|------------|-------------------------------------------------------------|--------------------------------------------------------|------------------------------------|-----------|----------------|---------------------|--------|--------|--------|
|                                       |                                                 |            |                                                             |                                                        |                                    |           |                | Tumor               | Normal | Stroma | Immune |
| E3                                    | Colon: right / Colon: right                     | Tumor      | Adenocarcinoma of colon                                     | Adenocarcinoma of colon                                | AJCC G1: Well differentiated       | pT2pN0pMX | I              | no tumor            | +/-    | +      | NI     |
| E5                                    | Colon: left / Colon: left                       | Tumor      | Adenocarcinoma of colon                                     | Adenocarcinoma of colon                                | AJCC G2: Moderately differentiated | pT2pN0pMX | I              | ++                  | NP     | ++     | NI     |
| H2                                    | Colon: right / Colon: right                     | Tumor      | Adenocarcinoma of colon                                     | Adenocarcinoma of colon                                | AJCC G2: Moderately differentiated | pT2pN0pMX | I              | +                   | NP     | +/-    | NI     |
| B2                                    | Colon: sigmoid / Colon: sigmoid                 | Tumor      | Adenocarcinoma of colon                                     | Adenocarcinoma of colon                                | AJCC G1: Well differentiated       | pT3pN0pMX | IIA            | ++                  | NP     | ++     | NI     |
| C2                                    | Colon: right / Colon: right                     | Tumor      | Adenocarcinoma of colon, mucinous                           | Adenocarcinoma of colon, mucinous                      | Not Reported                       | pT3pN0pMX | IIA            | -                   | NP     | +/-    | ++     |
| C4                                    | Colon: right / Colon: right                     | Tumor      | Adenocarcinoma of colon                                     | Adenocarcinoma of colon                                | AJCC G2: Moderately differentiated | pT3pN0pMX | IIA            | +                   | NP     | +      | ++     |
| D1                                    | Rectum / Rectum                                 | Tumor      | Adenocarcinoma of rectum                                    | Adenocarcinoma of rectum                               | AJCC G2: Moderately differentiated | pT3pN0pMX | IIA            | +/-                 | NP     | +      | ++     |
| D5                                    | Cecum / Cecum                                   | Tumor      | Adenocarcinoma of colon                                     | Adenocarcinoma of colon                                | AJCC G1: Well differentiated       | pT3pN0pMX | IIA            | +/-, +, ++          | NP     | ++     | NI     |
| E1                                    | Cecum / Cecum                                   | Tumor      | Adenocarcinoma of colon                                     | Adenocarcinoma of colon                                | Not Reported                       | pT3pN0pMX | IIA            | Section absent      |        |        |        |
| E4                                    | Colon: right / Colon: right                     | Tumor      | Adenocarcinoma of colon                                     | Adenocarcinoma of colon                                | AJCC G2: Moderately differentiated | pT3pN0pMX | IIA            | ++                  | NP     | ++     | ++     |
| F3                                    | Colon: left / Colon: left                       | Tumor      | Adenocarcinoma of colon                                     | Adenocarcinoma of colon                                | AJCC G2: Moderately differentiated | pT3pN0pM0 | IIA            | +/-, +, ++          | NP     | ++     | NI     |
| F4                                    | Colon: hepatic flexure / Colon: hepatic flexure | Tumor      | Adenocarcinoma of colon                                     | Adenocarcinoma of colon                                | AJCC G2: Moderately differentiated | pT3pN0pMX | IIA            | ++                  | NP     | ++     | NI     |
| H3                                    | Colon: transverse / Colon: transverse           | Tumor      | Adenocarcinoma of colon                                     | Adenocarcinoma of colon                                | AJCC G2: Moderately differentiated | pT3pN0pMX | IIA            | +/-, +, ++          | NP     | +      | NI     |
| G5                                    | Colon: sigmoid / Colon: sigmoid                 | Tumor      | Adenocarcinoma of colon                                     | Adenocarcinoma of colon                                | AJCC G1: Well differentiated       | pT4pN0pMX | IIB            | +/-                 | NP     | +      | NI     |
| H5                                    | Colon: sigmoid / Colon: sigmoid                 | Tumor      | Adenocarcinoma of colon                                     | Adenocarcinoma of colon                                | AJCC G2: Moderately differentiated | pT4pN0pMX | IIB            | -                   | NP     | +      | +      |
| H1                                    | Colon / Lymph node                              | Tumor      | Adenocarcinoma of colon, metastatic                         | Adenocarcinoma of colon, metastatic                    | Not Reported                       | pTXpN1pMX | IIIA           | +                   | NP     | ++     | ++     |
| B1                                    | Colon: sigmoid / Colon: sigmoid                 | Tumor      | Adenocarcinoma of colon                                     | Adenocarcinoma of colon                                | AJCC G4: Undifferentiated          | pT3pN1pMX | IIIB           | +                   | NP     | +      | NI     |
| C5                                    | Cecum / Cecum                                   | Tumor      | Adenocarcinoma of colon                                     | Adenocarcinoma of colon                                | AJCC G1: Well differentiated       | pT3pN1pMX | IIIB           | +                   | NP     | +/-    | ++     |
| E2                                    | Colon: right / Colon: right                     | Tumor      | Adenocarcinoma of colon                                     | Adenocarcinoma of colon                                | AJCC G2: Moderately differentiated | pT3pN1pMX | IIIB           | ++                  | NP     | +      | NI     |
| F1                                    | Colon / Colon                                   | Tumor      | Adenocarcinoma of colon                                     | Adenocarcinoma of colon                                | AJCC G2: Moderately differentiated | pT3pN1pMX | IIIB           | -                   | NP     | +/-    | NI     |
| F5                                    | Colon: transverse / Colon: transverse           | Tumor      | Adenocarcinoma of colon, mucinous                           | Adenocarcinoma of colon                                | AJCC G3: Poorly differentiated     | pT3pN1pMX | IIIB           | Section too damaged |        |        |        |
| G4                                    | Cecum / Cecum                                   | Tumor      | Adenocarcinoma of colon                                     | Adenocarcinoma of colon                                | AJCC G3: Poorly differentiated     | pT3pN1pMX | IIIB           | +/-, +, ++          | NP     | ++     | NI     |
| C1                                    | Colon: rectosigmoid / Colon: rectosigmoid       | Tumor      | Adenocarcinoma of colon                                     | Adenocarcinoma of colon                                | AJCC G2: Moderately differentiated | pT3pN2pMX | IIIC           | ++                  | NP     | +      | NI     |
| D3                                    | Colon: rectosigmoid / Colon: rectosigmoid       | Tumor      | Adenocarcinoma of colon                                     | Adenocarcinoma of colon                                | AJCC G2: Moderately differentiated | pT3pN2pMX | IIIC           | no tumor            | +/-    | +/-    | ++     |
| F2                                    | Colon: left / Colon: left                       | Tumor      | Adenocarcinoma of colon                                     | Adenocarcinoma of colon                                | Not Reported                       | pT3pN2pMX | IIIC           | +                   | NP     | ++     | NI     |
| G1                                    | Colon: left / Colon: left                       | Tumor      | Adenocarcinoma of colon                                     | Adenocarcinoma of colon                                | AJCC G1: Well differentiated       | pT4pN2pMX | IIIC           | ++                  | NP     | +      | NI     |
| G2                                    | Colon: right / Colon: right                     | Tumor      | Adenocarcinoma of colon                                     | Adenocarcinoma of colon                                | AJCC G1: Well differentiated       | pT3pN2pMX | IIIC           | ++                  | NP     | +      | ++     |
| G3                                    | Cecum / Cecum                                   | Tumor      | Adenocarcinoma of colon, mucinous                           | Adenocarcinoma of colon, mucinous                      | AJCC G2: Moderately differentiated | pT3pN2pMX | IIIC           | +                   | NP     | +      | NI     |
| H4                                    | Cecum / Cecum                                   | Tumor      | Adenocarcinoma of colon                                     | Adenocarcinoma of colon                                | AJCC G1: Well differentiated       | pT4pN2pMX | IIIC           | ++                  | NP     | ++     | NI     |
| A1                                    | Colon / Liver                                   | Tumor      | Adenocarcinoma of colon, metastatic                         | Adenocarcinoma of colon, metastatic                    | AJCC G2: Moderately differentiated | pTXpNXpM1 | IV             | Section absent      |        |        |        |
| A2                                    | Colon / Liver                                   | Tumor      | Adenocarcinoma of colon, metastatic                         | Adenocarcinoma of colon, metastatic                    | Not Reported                       | pTXpNXpM1 | IV             | Section absent      |        |        |        |
| A3                                    | Colon: left / Colon: left                       | Tumor      | Adenocarcinoma of colon                                     | Adenocarcinoma of colon                                | AJCC G2: Moderately differentiated | pT3pN1pM1 | IV             | +/-, +, ++          | NP     | -      | NI     |
| A4                                    | Colon / Liver                                   | Tumor      | Adenocarcinoma of colon, metastatic                         | Adenocarcinoma of colon, metastatic                    | AJCC G2: Moderately differentiated | pTXpNXpM1 | IV             | +                   | NP     | +      | NI     |
| A5                                    | Colon / Liver                                   | Tumor      | Adenocarcinoma of colon, metastatic                         | Adenocarcinoma of colon, metastatic                    | Not Reported                       | pTXpNXpM1 | IV             | +                   | NP     | +      | NI     |
| B3                                    | Colon / Liver                                   | Tumor      | Adenocarcinoma of colon, metastatic                         | Adenocarcinoma of colon, metastatic                    | Not Reported                       | pTXpNXpM1 | IV             | +/-                 | NP     | +      | NI     |
| B4                                    | Colon / Liver                                   | Tumor      | Adenocarcinoma of colon, metastatic                         | Adenocarcinoma of colon, metastatic                    | Not Reported                       | pTXpNXpM1 | IV             | +                   | NP     | ++     | NI     |
| B5                                    | Colon / Liver                                   | Tumor      | Adenocarcinoma of colon, metastatic                         | Adenocarcinoma of colon, metastatic                    | Not Reported                       | pTXpNXpM1 | IV             | -, +/-              | NP     | -      | NI     |
| C3                                    | Colon / Lung                                    | Tumor      | Adenocarcinoma of colon, metastatic                         | Adenocarcinoma of colon, metastatic                    | Not Reported                       | pTXpNXpM1 | IV             | Section absent      |        |        |        |
| D2                                    | Colon: right / Colon: right                     | Tumor      | Adenocarcinoma of colon                                     | Adenocarcinoma of colon                                | AJCC G1: Well differentiated       | pT3pN0pM1 | IV             | ++                  | NP     | ++     | NI     |
| D4                                    | Colon / Liver                                   | Tumor      | Adenocarcinoma, metastatic, consistent with colon primary   | Adenocarcinoma of colon, metastatic                    | AJCC G2: Moderately differentiated | pTXpNXpM1 | IV             | Section absent      |        |        |        |
| I1                                    | Colon / Colon                                   | Normal     | Within normal limits                                        | Adenocarcinoma of colon, metastatic                    | Not Reported                       | pTXpN1pMX | IIIA           | NP                  | +/-    | +/-    | NI     |
| I2                                    | Colon: right / Colon: right                     | Normal     | Within normal limits                                        | Adenocarcinoma of colon                                | AJCC G2: Moderately differentiated | pT2pN0pMX | I              | Section absent      |        |        |        |
| I3                                    | Colon: transverse / Colon: transverse           | Normal     | Within normal limits                                        | Adenocarcinoma of colon                                | AJCC G2: Moderately differentiated | pT3pN0pMX | IIA            | NP                  | +/-    | +/-    | NI     |
| I4                                    | Colon / Colon                                   | Normal     | Within normal limits                                        | Adenocarcinoma of colon                                | AJCC G1: Well differentiated       | pT4pN2pMX | IIIC           | NP                  | +/-    | +/-    | NI     |
| I5                                    | Colon: sigmoid / Colon: sigmoid                 | Normal     | Within normal limits                                        | Adenocarcinoma of colon                                | AJCC G2: Moderately differentiated | pT4pN0pMX | IIB            | Section absent      |        |        |        |
| NI: Not Identified<br>NP: Not Present |                                                 |            |                                                             |                                                        |                                    |           |                |                     |        |        |        |
