# Supplementary material for: Regulation of the THRA gene, encoding the thyroid hormone nuclear receptor TRα1, in intestinal lesions
Source: PubMed Central journal article supplement (PMC9718118; doi:10.1002/1878-0261.13298), 2022-10-10
Supplement: MOL2-16-3975-s005.pdf [file MOL2-16-3975-s005.pdf]

**Table S1. List of primers**

| <b>Primers used for RT-qPCR</b>                  |                                          |                       |
|--------------------------------------------------|------------------------------------------|-----------------------|
| <b>Gene</b>                                      | <b>Sequence</b>                          | <b>Product length</b> |
| <i>Axin2</i>                                     | F: ATG CTA GGC GGA ATG AAG ATG           | 250                   |
|                                                  | R: GGA GAC AAC GCT GTT GTT CTC           |                       |
| <i>Ccnd1</i>                                     | F: CAG AGG CGG ATG AGA ACA AGT           | 180                   |
|                                                  | R: GCG GTA GCA GGA GAG GAA G             |                       |
| <i>Cd44</i>                                      | F: GAA TGT AAC CTG CCG CTA               | 267                   |
|                                                  | R: GGA GGT GTT GGA CGT GAC               |                       |
| <i>Hprt</i>                                      | F: GCT GGT GAA AAG GAC CTC T             | 240                   |
|                                                  | R: CAC AGG ACT AGA ACA CCT GC            |                       |
| <i>Myc</i>                                       | F: GTT GGA AGA GCC GTG TGT G             | 129                   |
|                                                  | R: CGC TGA TGT TGG GTC AGT C             |                       |
| <i>Ppib</i>                                      | F: CAC CAA TGG CTC ACA GTT CTT           | 156                   |
|                                                  | R: ATG ACA TCC TTC AGT GGC TTG           |                       |
| <i>TR<math>\alpha</math>1</i>                    | F: TGC CTT TAA CCT GGA TGA CAC           | 240                   |
|                                                  | R: TCG ACT TTC ATG TGG AGG AAG           |                       |
| <i>Wif1</i>                                      | F: ATG TAT TTG CCC TCC TGG ACT           | 135                   |
|                                                  | R: GAG CAC AGG TCT CCT TGG TAA           |                       |
| <i>CTNNB1</i>                                    | F: TGC CAA GTG GGT GGT ATA GAG           | 126                   |
|                                                  | R: CCA TCT CTG CTT CTT GGT GTC           |                       |
| <b>Primers used for ChIP-qPCR</b>                |                                          |                       |
| <i>THRA-1</i>                                    | F: GTG GTC TCA AAA TCC TGA CCT           | 154                   |
|                                                  | R: TGC TCT CCC AGA TTT ATC CTC           |                       |
| <i>THRA-2</i>                                    | F: AGA ATT GCT TGA ACC CAG GAG           | 184                   |
|                                                  | R: TGT CCC TGT TGA GAG GAA ATG           |                       |
| <i>AXIN2</i>                                     | F: CTG GAG CCG GCT GCG CTT TGA TAA       | 98                    |
|                                                  | R: CGG CCC CGA AAT CCA TCG CTC TGA       |                       |
| <i>MYC</i>                                       | F: GTG AAT ACA CGT TTG CGG GTT AC        | 304                   |
|                                                  | R: AGA GAC CCT TGT GAA AAA AAC CG        |                       |
| <i>HPRT</i>                                      | F: CCA AAG ATG GTC AAG GTC GC            | 250                   |
|                                                  | R: CTG CTG ACA AAG ATT CAC TGG           |                       |
| <i>PPIB</i>                                      | F: ATG ATC CAG GGC GGA GAC TT            | 102                   |
|                                                  | R: GCC CGT AGT GCT TCA GTT TG            |                       |
| <b>Primers used to analyze Apc gene deletion</b> |                                          |                       |
| <i>Apc<math>\Delta</math>14<sup>fl</sup></i>     | F: GTT CTG TAT CAT GGA AAG ATA GGT GGT C | 800                   |
|                                                  | R: GAG TAC GGG GTC TCT GTC TCA GTG AA    |                       |
