# Supplementary material for: Regulation of the THRA gene, encoding the thyroid hormone nuclear receptor TRα1, in intestinal lesions
Source: PubMed Central journal article supplement (PMC9718118; doi:10.1002/1878-0261.13298), 2022-10-10

**Giolito et al, Figure S2**

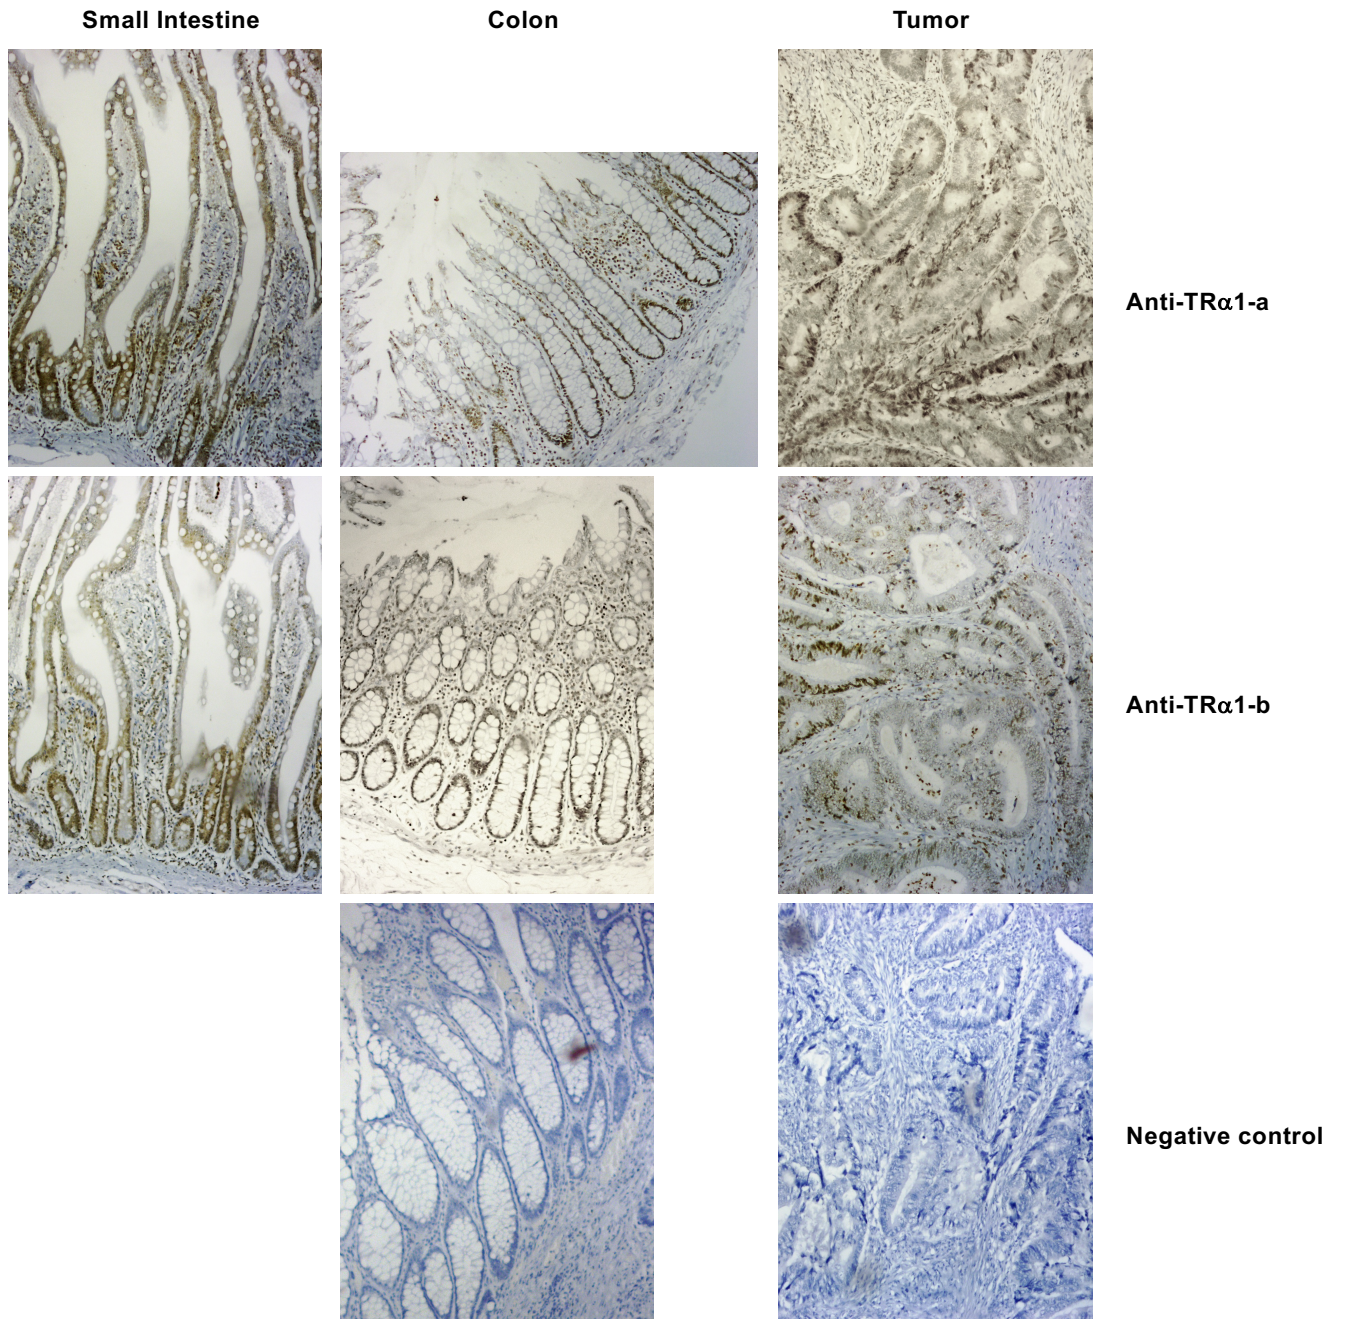

Supplement: MOL2-16-3975-s009.pdf [file MOL2-16-3975-s009.pdf]
