# Supplementary material for: Regulation of the THRA gene, encoding the thyroid hormone nuclear receptor TRα1, in intestinal lesions
Source: PubMed Central journal article supplement (PMC9718118; doi:10.1002/1878-0261.13298), 2022-10-10
Supplement: MOL2-16-3975-s012.pdf [file MOL2-16-3975-s012.pdf]

**Table S2. List of antibodies**

| <b>Antibodies used for Western Blot</b> |                             |                  |                |                 |
|-----------------------------------------|-----------------------------|------------------|----------------|-----------------|
| <b>Protein</b>                          | <b>Brand</b>                | <b>Reference</b> | <b>Species</b> | <b>Dilution</b> |
| $\beta$ -actin                          | Sigma                       | A5441            | Mouse          | 1/10000         |
| $\beta$ -catenin                        | Santa Cruz<br>Biotechnology | sc-7963          | Mouse          | 1/500           |
| $\beta$ -catenin                        | BD Transduction             | Clone 14         | Mouse          | 1/500           |
| TR $\alpha$ 1                           | Abcam                       | ab53729          | Rabbit         | 1/500           |
| Anti-mouse IgG HRP conjugate            | Promega                     | W402B            | Goat           | 1/5000          |
| Anti-rabbit IgG HRP conjugate           | Promega                     | W401B            | Goat           | 1/5000          |
