# Supplementary material for: Regulation of the THRA gene, encoding the thyroid hormone nuclear receptor TRα1, in intestinal lesions
Source: PubMed Central journal article supplement (PMC9718118; doi:10.1002/1878-0261.13298), 2022-10-10
Supplement: MOL2-16-3975-s014.pdf [file MOL2-16-3975-s014.pdf]

**A**

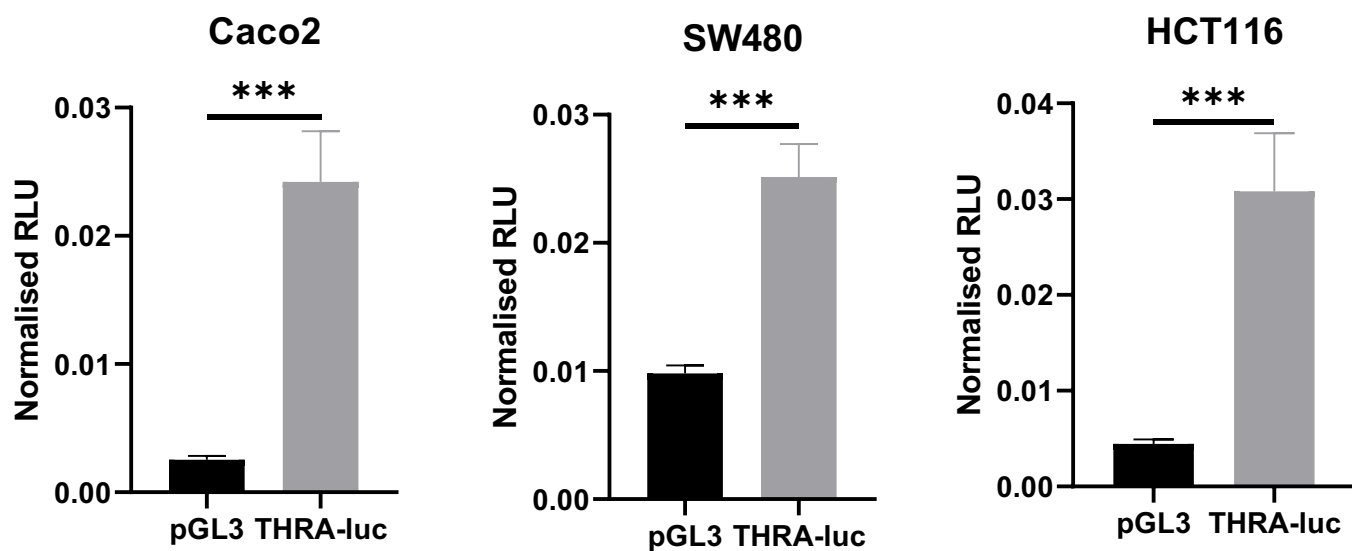

**B**

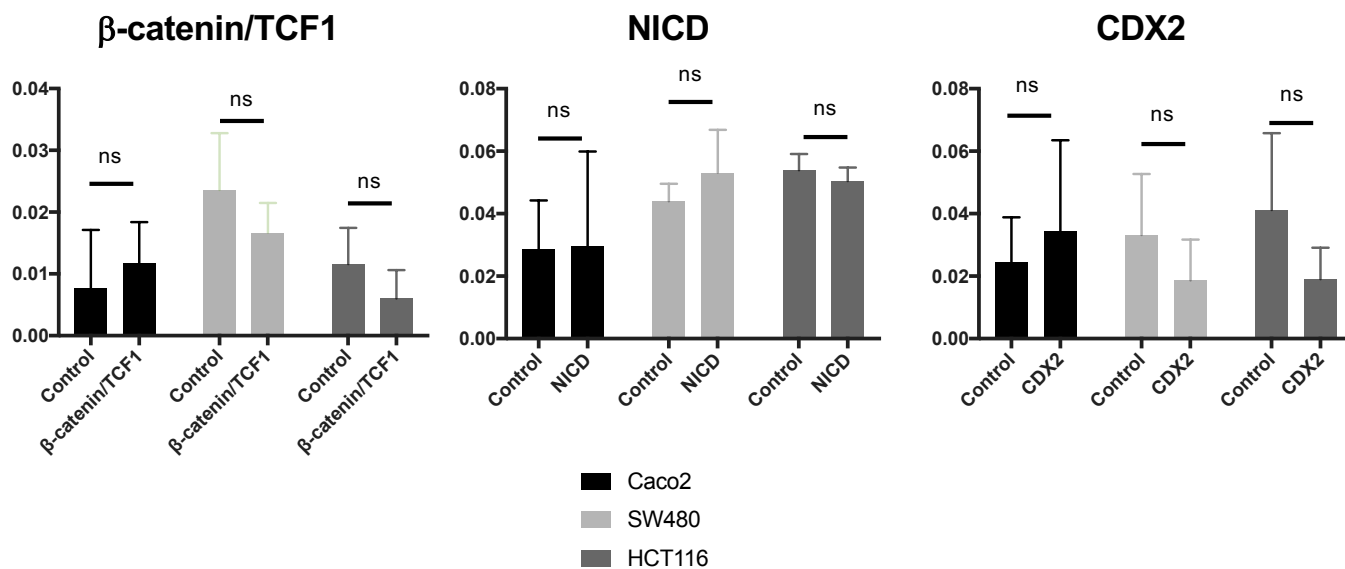

Caco2  
 SW480  
 HCT116
